# Supplementary material
Source: PubMed Central journal article supplement (PMC5672049)
Supplement: 10.1074_M117.792697_jbc.M117.792697-1.pdf [file 10.1074_M117.792697_jbc.M117.792697-1.pdf]

# A mutant of the *BmK* antitumor-analgesic peptide exhibits reduced inhibition to hNav1.4 and hNav1.5 channels while retaining analgesic activity

Yijia Xu<sup>1</sup>, Xiangxue Meng<sup>1</sup>, Xue Hou<sup>1</sup>, Jianfang Sun<sup>2</sup>, Xiaohua Kong<sup>1</sup>, Yuqi Sun<sup>1</sup>, Zeyu Liu<sup>1</sup>, Yuanyuan Ma<sup>1</sup>, Ye Niu<sup>1</sup>, Yongbo Song<sup>1</sup>, Yong Cui<sup>3</sup>, Mingyi Zhao<sup>1,\*</sup> and Jinghai Zhang<sup>3,\*</sup>

Supplementary

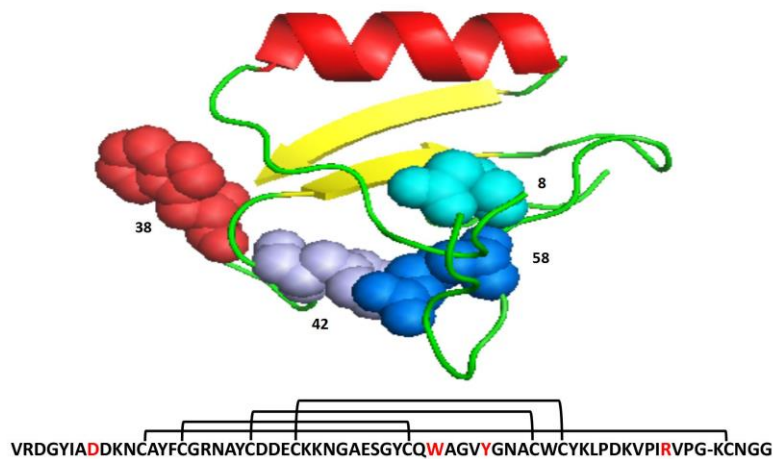

Figure S1. Homology modeling structure of AGAP.

Based on the sequence analysis and homology modeling, AGAP has been classified as an  $\alpha$ -type long-chain scorpion toxin, it constitutes two surfaces opposite to each other, named Face A and Face B. Three domains are closely associated with its biological activities, including the N-terminal domain (the first three N-terminal residues), the core domain (the loop preceding the  $\alpha$ -helix and the other loop between the  $\beta$ 2- and  $\beta$ 3-sheets) and the NC domain (8-12 residues turn and 56-64 residues in C-terminal region). Trp<sup>38</sup> and Tyr<sup>42</sup> are located in core domain, Asp<sup>8</sup> and Arg<sup>58</sup> are located in NC domain. The amino acid sequence of AGAP are showed and the disulfide bonds formed between cysteine pairs are marked by solid lines.

**A hNa<sub>v</sub>1.4**

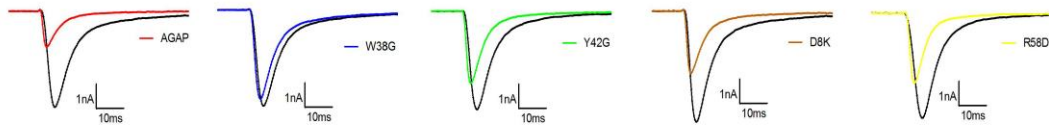

**B hNa<sub>v</sub>1.5**

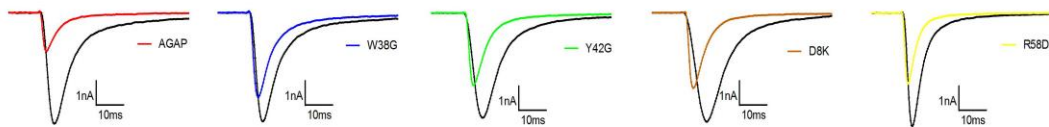

Figure S2. Effects of AGAP and its mutants on the Na<sup>+</sup> peak current of hNa<sub>v</sub>1.4 and hNa<sub>v</sub>1.5.

The Na<sup>+</sup> currents were obtained by plotting current peak amplitudes with a function of test potentials ranging from -80 mV to +80 mV for 50 ms from the holding potential of -80 mV in increments of 10 mV. The current traces were evoked by -20 mV for 50 ms from a holding potential of -80 mV in the absence and presence of 100nM AGAP and its mutants. Averaged current traces were obtained from hNa<sub>v</sub>1.4-CHO (A) and hNa<sub>v</sub>1.5-CHO (B) (n = 5).

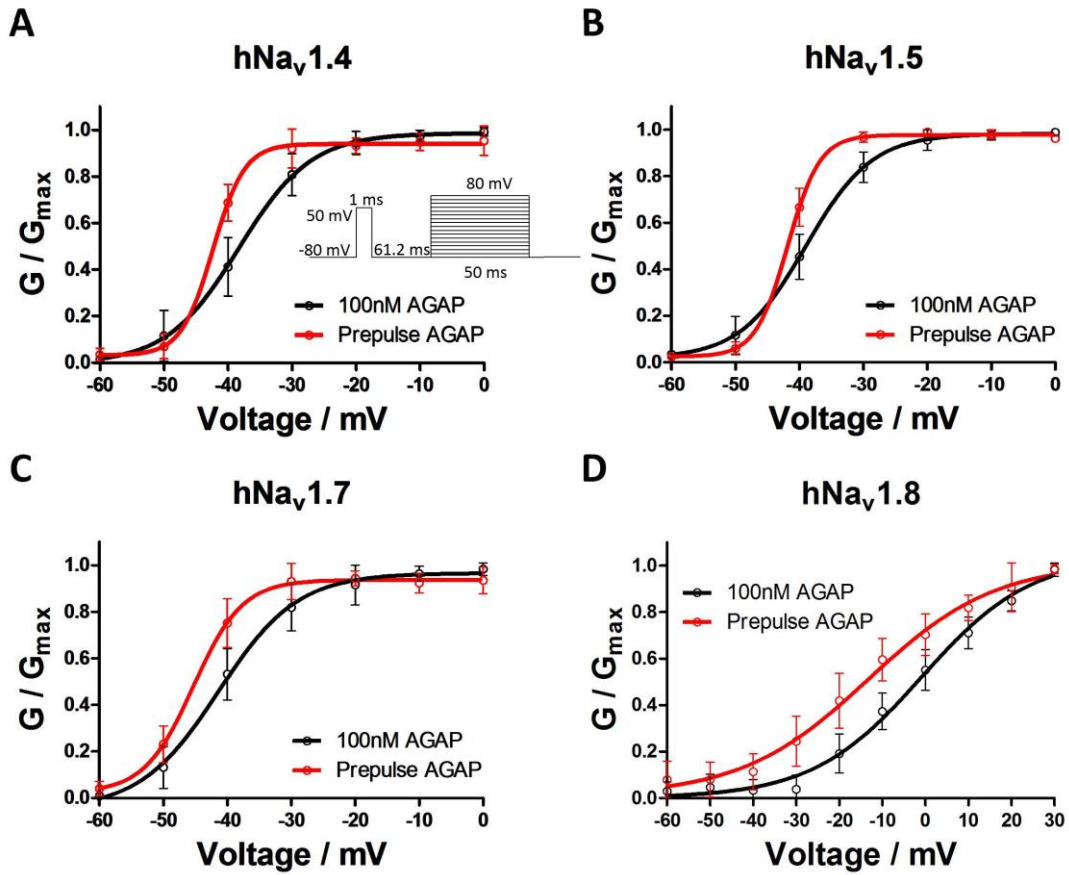

Figure S3. Effects of AGAP on activation of hNav<sub>v</sub>1.4, hNav<sub>v</sub>1.5, hNav<sub>v</sub>1.7 and hNav<sub>v</sub>1.8 without a prepulse or with a prepulse

Normalized conductance-voltage relationships of hNav<sub>v</sub>1.4 (A), hNav<sub>v</sub>1.5 (B), hNav<sub>v</sub>1.7 (C) and hNav<sub>v</sub>1.8(D) in the presence of 100 nM AGAP without a prepulse or with a +50 mV, 1 ms prepulse that preceded the test pulse by 61.2 ms. Each point represents mean  $\pm$  SEM (n = 5).
